# Supplementary material for: A retrospective study on the effect of Chinese patent medicine combined with conventional treatment on the survival outcomes of 313 patients with stage II–III NSCLC
Source: publisher site journal article supplement (doi:10.18632/aging.205697), 2024-03-28
Supplement: Supplementary file [file aging-v16i7-205697-supplementary-material-SD1.pdf]

## SUPPLEMENTARY TABLE

Supplementary Table 1. The abbreviation list.

| Abbreviation | Full title                   |
|--------------|------------------------------|
| CPM          | Chinese patent medicine      |
| DFS          | Disease free survival        |
| FIB          | Fibrinogen                   |
| HIS          | Hospital information system  |
| HSOS         | Huisheng oral solution       |
| NSCLC        | Non-small cell lung cancer   |
| OS           | Overall survival             |
| PLT          | Platelet                     |
| TCM          | Traditional Chinese medicine |
