# Supplementary material for: A retrospective study on the effect of Chinese patent medicine combined with conventional treatment on the survival outcomes of 313 patients with stage II–III NSCLC
Source: Aging (Albany NY). 2024 Mar 28;16(7):6212–28. doi: 10.18632/aging.205697 (PMC11042965; doi:10.18632/aging.205697)
Supplement: Supplementary Table 2 [file aging-16-205697-s002.xlsx]

## Sheet: Raw Data
Supplementary Table 2. The clinical information of participants.
ID	Ethnic Group	Age	Gender	Pathological Type	Tumor Stage	PLT(109/L)	FIB(g/L)	D-Dimer(mg/L)	TT(s)	PT(s)	APTT(s)	Date of Enrollment	Date of Last Follow-up	Lost to Follow-up	Death	Outcome	Time to Event(Months)	Surgery	Chemotherapy	Radiotherapy	Targetedtherapy	Immunotherapy	Targeted or Immunotherapy	Anticoagulants	Chinese Patent Medicine	Huisheng Oral Solution	Fu-fangbanmao Capsule	Shenyi Capsule	Kanglixin Capsule	Cinobufacin Capsule	Fructus Bruccae Emulsion	Aidi Injection	Kangai Injection	Others
P001	Han	64	Female	Adenocarcinoma	Ⅱa	119	3.25		16.3	12.1	23.7	2016-09-18	2016-10-21	Yes		Censored	1	Yes	Yes	No	No	No	No	No	55	14	14		14		5	4	4
P002	Han	56	Male	Squamous Carcinoma	Ⅲb	182	4.2		15.9			2016-07-12	2017-07-17	No	Yes	Death	16	No	Yes	Yes	No	No	No	No	320	72			120		40	16	66	6
P003	Han	50	Female	Adenocarcinoma	Ⅲa	154	2.16	16.19	20.6	10.8	27.4	2016-03-18	2019-11-15	No	No	Censored	43	Yes	No	No	Yes	No	Yes	No	35		14				7	7	7
P004	Han	49	Male	Adenocarcinoma	Ⅱa	164	3.58		20.7			2015-12-22	2019-11-15	No	Yes	Death	4	Yes	Yes	No	No	No	No	No	67		43				5		19
P005	Han	72	Male	Adenocarcinoma	Ⅲa							2016-02-02	2019-11-15	No	No	Censored	45	Yes	Yes	No	No	No	No	No	55	14	28				6	2	5
P006	Han	69	Female	Adenocarcinoma	Ⅲa	202	3.26		20.5			2015-10-29	2019-11-15	No	Yes	Death	29	No	No	No	No	No	No	No	41	14	14	13
P007	Han	66	Male	Squamous Carcinoma	Ⅱa	157	3.29		19.9	10.7	31.5	2015-12-02	2019-11-15	No	No	Censored	47	Yes	No	No	No	No	No	Yes	44	30						7	7
P008	Han	48	Male	Adenocarcinoma	Ⅲa	273	2.63	0.62	20.7	10.8	23.4	2016-04-07	2017-09-14	No	Yes	Death	24	Yes	Yes	Yes	No	No	No	No	864	27	28	28	251	360	59	49	58	4
P009	Han	42	Male	Adenocarcinoma	Ⅲb	186	3		16.5	10.4	23.6	2016-12-08	2019-11-15	No	No	Censored	35	No	Yes	Yes	No	No	No	Yes	179	57	14		55		29	8	16
P010	Han	63	Female		Ⅲa	213	6.96	0.43	14.6	11.1	27.7	2016-08-08	2016-08-09	Yes		Censored	0	No	Yes	No	No	No	No	No
P011	Han	57	Male	Adenocarcinoma	Ⅲa	137	3.75		20.4			2016-04-29	2019-11-15	No	No	Censored	42	Yes	No	Yes	No	No	No	No	538	194		14	330
P012	Han	52	Female	Adenocarcinoma	Ⅲb	238	4.27		15.8	11.3	30.1	2016-08-23	2019-11-15	No	No	Censored	38	Yes	Yes	No	No	No	No	No	28	14		14
P013	Han	56	Male	Squamous Carcinoma	Ⅲa	180	3.54		16			2016-05-24	2016-12-28	No	Yes	Death	32	Yes	Yes	No	No	No	No	No	98	42	42				7	7
P014	Han	61	Female	Adenocarcinoma	Ⅱb	337	2.4	1.01	17.4	12	26.8	2016-12-21	2019-11-15	No	No	Censored	34	Yes	Yes	No	No	No	No	No	48		14	14			11		9
P015	Han	64	Male	Adenocarcinoma	Ⅱa	91	2		17.8	11.2	24.5	2016-10-14	2019-11-15	No	No	Censored	37	Yes	Yes	No	No	No	No	No	1046	973				30	36		7
P016	Han	50	Female	Adenocarcinoma	Ⅱb	278	3.2		18.4			2015-05-07	2015-06-25	No	Yes	Death	4	Yes	Yes	No	No	No	No	No	26	14						9	3
P017	Han	47	Female	Squamous Carcinoma	Ⅱa	292	3.64	0.59	18.4	12.3	27.9	2016-01-29	2016-02-19	No	Yes	Death	29	Yes	Yes	No	No	No	No	No	49		14	14			7	7	7
P018	Han	67	Female	Adenocarcinoma	Ⅲa	191	2.3		20.5			2015-02-27	2019-11-15	No	Yes	Death	47	Yes	Yes	Yes	No	No	No	No	68		14	14				23	17
P019	Han	61	Female	Adenocarcinoma	Ⅲa	68	3.29	0.19	19.2	11.4	27.3	2016-04-27	2018-02-01	No	Yes	Death	39	Yes	Yes	No	No	No	No	No	70	14	28	14			7		7
P020	Han	61	Female	Poor Differentiated Carcinoma	Ⅲa	226	4.54	0.42	15.1	12.4	32.2	2016-11-17	2016-12-19	Yes		Censored	1	Yes	Yes	No	No	No	No	No	12						6		6
P021	Han	63	Male	Squamous Carcinoma	Ⅱa		6.4		17.1			2015-02-12	2015-07-03	No	Yes	Death	24	No	Yes	No	No	No	No	No	301	33	135	90			22		21
P022	Han	32	Male	Poor Differentiated Carcinoma	Ⅲb	178	4.71		20.2			2015-08-19	2019-11-15	No	Yes	Death	1	No	No	No	No	No	No	No
P023	Han	50	Female	Adenocarcinoma	Ⅲa	159	2.4		18.4	9.9	26.8	2015-02-04	2015-01-19	No	Yes	Death	12	Yes	No	Yes	No	No	No	No	28	14		14
P024	Han	66	Female	Adenocarcinoma	Ⅲa	167	4.04		18.5	11.3	31.7	2015-08-04	2016-01-11	No	Yes	Death	8	Yes	Yes	No	No	No	No	No	433	344		10			55		24
P025	Han	61	Female	Adenocarcinoma	Ⅱb	262	3		16	10.6	33.5	2016-07-26	2016-08-12	Yes		Censored	0	Yes	No	No	No	No	No	No	71		34	30				7
P026	Han	56	Female	Adenocarcinoma	Ⅲa	82	1.87		17.1	11.2	26.4	2016-10-01	2019-11-15	No	No	Censored	37	Yes	Yes	No	No	No	No	No	559	530		22			7
P027	Han	72	Male	Adenocarcinoma	Ⅲb	211	4.54		18.8	11.4	34.1	2015-08-04	2019-11-15	No	Yes	Death	28	No	Yes	Yes	No	No	No	No	696	214			245		80	55	84	18
P028	Han	70	Female	Squamous Carcinoma	Ⅱb	203	2.51		19.2	11.9	28.4	2016-02-17	2019-11-15	No	Yes	Death	36	No	No	No	Yes	No	Yes	No	47	14					11	11	11
P029		54	Male		Ⅲb	517	6.7		19.2	12.4	45.7	2015-05-18	2019-11-15	No	Yes	Death	9	Yes	No	No	No	No	No	No	800	434	254	104			8
P030	Zang	70	Male	Squamous Carcinoma	Ⅱa	279	2.7		19.4			2015-02-05	2015-05-04	Yes		Censored	2	Yes	Yes	No	No	No	No	No	160	104	14	30					12
P031	Han	66	Male	Adenocarcinoma	Ⅲb	226	3.7	0.33	18.2	9.9	22.9	2015-01-16	2019-11-15	No	Yes	Death	26	No	Yes	Yes	Yes	No	Yes	No	179	71	21		14		27	15	31
P032	Han	55	Male		Ⅲa	473	6.5		19.5			2015-12-25	2019-11-15	No	Yes	Death	24	Yes	Yes	Yes	Yes	No	Yes	No	48			30			4	14
P033	Han	44	Male	Adenocarcinoma	Ⅲb	195	2.7		20			2015-06-30	2017-12-08	Yes		Censored	29	No	No	No	No	No	No	No	7							7
P034	Han	60	Female	Adenocarcinoma	Ⅲb	294	4.4		18.5			2015-08-20	2019-11-15	No	Yes	Death	0	No	No	No	No	No	No	No
P035	Han	72	Male	Squamous Carcinoma	Ⅲb	195	3.5		19.9			2015-04-14	2019-11-15	No	No	Censored	48	Yes	Yes	No	No	No	No	No	119	45		13	30		20		8	3
P036	Han	68	Male	Squamous Carcinoma	Ⅱa	248	4.71		16.5	10.8	30.4	2016-04-18	2017-03-03	No	Yes	Death	10	No	No	No	No	No	No	No	712	405			300			7
P037	Han	70	Male	Adenocarcinoma	Ⅲb	12	2.39	0.33	21.6	10.6	26.3	2015-11-30	2019-11-15	No	No	Censored	47	Yes	No	No	No	No	No	Yes	261	164			60	30		7
P038	Han	52	Male	Adenocarcinoma	Ⅱb	214	3.5		19.2			2015-03-22	2016-05-25	Yes		Censored	14	Yes	No	Yes	Yes	No	Yes	Yes	105	50	14	14			10	7	10
P039	Han	76	Male	Squamous Carcinoma	Ⅱb	194	4.6		21.3	10.9	28.2	2015-06-05	2019-11-15	Yes		Censored	48	Yes	Yes	No	No	No	No	No	118	40		60			18
P040	Han	65	Female	Adenocarcinoma	Ⅱb	119	3.18	0.16	16.6	10.5	26.3	2016-12-08	2019-11-15	No	No	Censored	35	Yes	No	No	No	No	No	Yes	577	570					7
P041	Han	68	Male		Ⅲa	264	5.8		16.2			2015-12-31	2016-01-07	No	Yes	Death	2	No	No	No	No	No	No	No	8								8
P042	Han	64	Male	Squamous Carcinoma	Ⅲb	404						2016-09-08	2019-11-15	No	Yes	Death	7	No	Yes	No	No	No	No	Yes	93	40					13	23	10	7
P043	Han	65	Male	Adenocarcinoma	Ⅲa	291	4		17.5	11.4	26	2016-09-12	2019-11-15	No	No	Censored	38	No	No	Yes	No	No	No	No
P044	Han	68	Male	Adenocarcinoma	Ⅱa	208	4.39	0.22	15.1	11.3	28.5	2016-12-15	2016-12-22	No	Yes	Death	15	Yes	No	No	No	No	No	No	44			44
P045	Han	76	Male	Adenocarcinoma	Ⅱb	299	4.59		19.4			2015-12-03	2019-11-15	No	Yes	Death	20	Yes	Yes	No	No	No	No	Yes	136	48	14	14	14		30		16
P046	Han	59	Female		Ⅱa	300	4.54	0.96	16.9	11.1	29.5	2016-08-08	2019-11-15	No	No	Censored	39	Yes	Yes	No	No	No	No	No	89		34	34			7	7	7
P047	Han	56	Male	Squamous Carcinoma	Ⅱb	147	2.4		21.2			2015-02-13	2015-05-20	No	Yes	Death	10	Yes	Yes	No	No	No	No	No	26		20				6
P048	Han	67	Male	Squamous Carcinoma	Ⅲa	253	4.86		18.7			2016-06-13	2019-11-15	No	No	Censored	41	Yes	Yes	No	No	No	No	No	30	30
P049	Han	67	Male	Adenocarcinoma	Ⅲa	383	6.07	0.24	20.7	13	36.3	2016-04-19	2016-12-12	No	Yes	Death	10	No	Yes	Yes	No	No	No	Yes	206	14			58		61	20	53
P050	Han	66	Female	Adenocarcinoma	Ⅲa	128	2.67		23.8			2015-11-05	2019-11-15	No	No	Censored	48	No	No	No	No	No	No	No	42	14	14	14
P051	Han	75	Male		Ⅲa							2015-09-02	2019-11-15	No	Yes	Death	7	No	Yes	No	No	No	No	No	96	19					24	19	34
P052	Zang	61	Male	Squamous Carcinoma	Ⅲa	155	2.92	0.58	19.2	10.7	22.7	2016-04-07	2017-06-29	Yes		Censored	14	No	Yes	Yes	No	No	No	No	124	54			14		20	16	20
P053	Han	60	Male	Adenocarcinoma	Ⅱb	232	3.06		15.3			2016-11-24	2019-11-15	No	No	Censored	35	Yes	No	No	No	No	No	No	600	600
P054	Han	52	Female	Adenocarcinoma	Ⅲa	279	2.6	0.12	18	10.4	23.7	2015-04-22	2019-11-15	No	No	Censored	48	Yes	No	No	No	No	No	No	141			14		120		7
P055	Han	82	Male	Squamous Carcinoma	Ⅱb	190	3.43		20.3			2016-06-03	2017-10-23	No	Yes	Death	17	No	No	No	No	No	No	No	65	60								5
P056	Zang	45	Male	Adenocarcinoma	Ⅱb	170	3.29		19.5			2016-05-11	2018-01-30	No	Yes	Death	22	Yes	Yes	No	No	No	No	No	24						16		8
P057	Han	67	Male		Ⅱb	281	4.45		17.2	10.6	27.4	2016-04-12	2019-11-15	No	No	Censored	43	Yes	Yes	No	No	No	No	No	398	136	28	14	210		5	5
P058	Han	69	Male	Poor Differentiated Carcinoma	Ⅲa	214	3.5		19.3	11.1	27.1	2015-06-15	2015-12-17	No	Yes	Death	13	No	Yes	Yes	No	No	No	No	274	157					8	48	9	52
P059	Han	45	Male	Squamous Carcinoma	Ⅲa	285	4.34		15.3	12	32.5	2016-12-01	2019-11-15	No	Yes	Death	13	No	Yes	Yes	No	No	No	No	156	102					25	10	19
P060	Han	68	Male	Poor Differentiated Carcinoma	Ⅱa	229	5.82	0.58	15	11	30.8	2016-12-30	2019-11-15	No	No	Censored	34	Yes	Yes	No	No	No	No	No	8						8
P061	Han	48	Male	Squamous Carcinoma	Ⅲa	244	3.74		17.1			2016-06-08	2019-11-15	No	No	Censored	41	Yes	Yes	No	No	No	No	No	53	14	39
P062	Han	74	Male	Adenocarcinoma	Ⅲa	84	4.52		19.7			2015-11-09	2018-01-11	Yes		Censored	26	No	Yes	Yes	No	No	No	No	29		15				7	7
P063	Han	29	Female	Adenocarcinoma	Ⅱb	139	1.72		18.4			2016-06-15	2019-11-15	No	No	Censored	41	Yes	Yes	No	No	No	No	No	28	14	14
P064	Han	54	Female		Ⅱb	84	1.87		21			2016-05-24	2019-11-15	No	No	Censored	41	No	No	No	Yes	No	Yes	No
P065	Han	65	Male	Adenocarcinoma	Ⅱa	80	2.12		23.1	11.7	30.9	2016-02-02	2016-03-16	No	Yes	Death	3	Yes	No	No	No	No	No	No	42	14	14					7	7
P066	Han	72	Male	Adenocarcinoma	Ⅱa	212	2.25		20.4			2016-05-16	2019-11-15	No	No	Censored	41	Yes	No	No	No	No	No	No	234	164	10	30		30
P067	Han	64	Male	Adenocarcinoma	Ⅱb	148	2.92		19.9			2016-04-26	2016-05-06	No	Yes	Death	7	Yes	Yes	No	No	No	No	No	14			14
P068	Han	80	Male		Ⅲa	128	4.2		19.4			2015-04-23	2019-11-15	No	Yes	Death	22	No	Yes	Yes	No	No	No	No	55		8	24			15		8
P069	Han	69	Male	Adenocarcinoma	Ⅲb	147	2.22		19.2			2016-05-03	2018-10-24	No	Yes	Death	32	Yes	Yes	No	No	No	No	No	14			14
P070	Han	54	Female	Spindle Cell Carcinoma	Ⅱb	227	1.73		17.4			2015-12-18	2016-01-27	Yes		Censored	1	Yes	No	No	No	No	No	No	85	30					18	20	17
P071	Han	53	Male	Squamous Carcinoma	Ⅲa	161	3.67		21			2015-12-30	2019-11-15	No	No	Censored	46	Yes	Yes	No	No	No	No	No	49		14	26			6	3
P072	Han	65	Male	Poor Differentiated Carcinoma	Ⅱb	138	2.86		20.3			2015-07-24	2019-11-15	No	No	Censored	48	Yes	Yes	No	No	No	No	No	98	14	54	14			8	8
P073	Han	67	Male	Squamous Carcinoma	Ⅲa	264	6.3	0.2	18.3	12.5	41.4	2015-06-04	2019-11-15	No	Yes	Death	9	No	Yes	Yes	No	No	No	No	157	48			8		30	14	57
P074	Han	61	Male		Ⅲa	169	3.33		20.1	14.5	26.6	2016-06-14	2016-06-27	Yes		Censored	0	No	No	No	No	No	No	No
P075	Han	70	Male	Adenocarcinoma	Ⅲb	354	5.24		17.8			2015-11-13	2019-11-15	No	Yes	Death	6	No	Yes	Yes	No	No	No	No	44	15				15		7		7
P076	Han	56	Female	Adenocarcinoma	Ⅲa	87	1.79		16.6	10.9	24.3	2016-12-29	2019-11-15	No	No	Censored	34	Yes	Yes	No	No	No	No	No	375	360					4	2	9
P077	Han	56	Male	Adenocarcinoma	Ⅲa	258	4.51		15.6	11	26.2	2016-09-13	2019-11-15	No	Yes	Death	40	No	Yes	No	No	No	No	No	1067	762	134		98		25	5	43
P078	Han	68	Male	Squamous Carcinoma	Ⅱb	111	3.26		16.3	10.7	24.1	2016-03-04	2019-11-15	No	No	Censored	44	Yes	No	No	No	No	No	No	28	14	14
P079	Zang	64	Male		Ⅲb	429	5.2		17.4			2015-07-01	2015-08-04	Yes		Censored	1	No	No	No	No	No	No	No	7								7
P080	Han	51	Male		Ⅱa	164	4.23		18.8			2016-06-20	2019-11-15	No	No	Censored	40	Yes	Yes	No	No	No	No	No
P081	Han	52	Male	Squamous Carcinoma	Ⅲa	270	4.86		18.6	12.6	31.9	2016-03-04	2016-05-03	No	Yes	Death	2	Yes	Yes	Yes	No	No	No	No	33		15				12	2	4
P082	Han	76	Male	Squamous Carcinoma	Ⅱb	133	4.03		17			2016-06-29	2016-06-30	Yes		Censored	0	No	No	No	No	No	No	No	10	10
P083	Han	63	Male	Squamous Carcinoma	Ⅱb	168	4.01		18.2	10.6	29.8	2016-03-21	2016-05-03	No	Yes	Death	1	Yes	Yes	Yes	No	No	No	No	76			14	29		20		13
P084	Han	65	Male	Squamous Carcinoma	Ⅲb	165	3.18		15.3			2015-05-12	2019-11-15	No	Yes	Death	30	Yes	Yes	Yes	No	No	No	No	497	135	15	104	60		14	48	18	103
P085	Han	55	Female	Squamous Carcinoma	Ⅱa	203	5.33		19.4	12.7	32.4	2016-01-12	2019-11-15	No	Yes	Death	24	Yes	Yes	Yes	Yes	No	Yes	No	1286	725				270	147		144
P086	Han	67	Male	Adenocarcinoma	Ⅲa	156	3.3	0.14	19.7	11	24.8	2015-04-01	2015-06-02	No	Yes	Death	15	Yes	No	No	No	No	No	No	56	28	28
P087	Han	67	Male	Squamous Carcinoma	Ⅲa	333	7.5		18.1			2015-04-25	2015-06-02	No	Yes	Death	25	Yes	Yes	No	No	No	No	No	49			34	8			7
P088	Han	76	Male	Adenocarcinoma	Ⅱb	149	3.15		15.8	12.4	25.9	2016-08-22	2016-09-06	No	Yes	Death	11	Yes	No	No	No	No	No	Yes	7								7
P089	Han	77	Male	Adenocarcinoma	Ⅲa	205	3.62	0.91	16.8	12.3	26.1	2016-10-12	2016-11-21	No	Yes	Death	2	Yes	Yes	No	No	No	No	No	35		14	14			7
P090	Han	81	Male		Ⅲa	214	3.16		21.6	11.4	26	2016-01-04	2017-07-04	Yes		Censored	18	No	No	No	No	No	No	Yes	7								7
P091	Han	70	Male		Ⅱa	103	3.12		16.3			2016-11-21	2017-05-18	No	Yes	Death	11	Yes	Yes	No	No	No	No	No	28	14		14
P092	Han	78	Male		Ⅲb	307	5.28		15.1			2015-07-06	2016-06-10	No	Yes	Death	23	No	No	No	No	No	No	No	23	14						9
P093	Han	63	Male	Adenocarcinoma	Ⅲa	228	6.71	0.08	19.1	11.7	25.9	2016-04-27	2019-11-15	No	Yes	Death	9	Yes	No	No	No	No	No	No
P094	Han	68	Female	Adenocarcinoma	Ⅲb	177	4.58		17.2	12.2	27.8	2015-12-30	2017-11-30	No	Yes	Death	34	Yes	Yes	Yes	No	No	No	No	56			15			27		14
P095	Han	73	Male	Adenocarcinoma	Ⅱb	207	3.22	1.58	20.7	12.3	31.2	2015-11-13	2015-12-17	No	Yes	Death	12	Yes	No	No	No	No	No	Yes	56	14	14	14				7	7
P096	Han	65	Female	Adenocarcinoma	Ⅲa	266	4.01	0.64	17.1	11.3	27.6	2016-04-01	2016-07-18	No	Yes	Death	13	Yes	Yes	No	No	No	No	No	14			14
P097	Han	59	Male	Squamous Carcinoma	Ⅱb	256	3.35	1.01	15.5	12.2	28.2	2016-11-30	2017-06-01	No	Yes	Death	8	Yes	No	No	No	No	No	No	40		30				5		5
P098	Han	54	Male	Squamous Carcinoma	Ⅱa	277	4.72		19.6			2015-12-10	2016-03-21	Yes		Censored	3	No	Yes	No	No	No	No	No	187	34	29		90		4	6	17	7
P099	Han	73	Female		Ⅲa	294	3.29	1.03	19.2	12.1	36.4	2016-01-07	2015-12-27	No	Yes	Death	12	No	No	No	No	No	No	No
P100	Han	67	Female	Adenocarcinoma	Ⅱb	183	3.25		18.3			2016-06-14	2017-04-29	Yes		Censored	10	Yes	Yes	No	No	No	No	No	10						4		6
P101	Han	79	Male	Adenocarcinoma	Ⅲa	197	6.07	0.81	18.3	10.9	39.6	2016-04-01	2019-11-15	No	Yes	Death	16	No	No	No	No	No	No	No
P102	Han	54	Female	Adenocarcinoma	Ⅲa	247	2.69		17.2	11.3	26.6	2016-11-24	2019-11-15	No	No	Censored	35	No	No	No	No	No	No	No
P103	Han	61	Male	Adenocarcinoma	Ⅲa	78	2.7	0.23	16.8	12.3	31	2016-08-29	2016-10-17	No	Yes	Death	22	Yes	Yes	No	No	No	No	No	56	14	14	14				7	7
P104	Han	62	Male	Squamous Carcinoma	Ⅲb	192	4.6		17.9			2015-03-23	2015-08-23	Yes		Censored	5	No	Yes	No	No	No	No	No	352	193	69	60	10		4		16
P105	Han	46	Female	Adenocarcinoma	Ⅱb	205	4.22		17.3	11	24.5	2016-03-16	2016-09-25	No	Yes	Death	8	Yes	Yes	No	No	No	No	No	21			14			7
P106	Han	64	Male	Squamous Carcinoma	Ⅲa	205	3.1		18.3			2015-07-13	2015-12-08	Yes		Censored	4	Yes	No	No	No	No	No	No	7							7
P107	Han	69	Male	Adenocarcinoma	Ⅲb	146	4.2		18.3	11	25.1	2015-01-14	2018-05-11	No	Yes	Death	40	No	Yes	Yes	No	No	No	No	373	129					124		120
P108	Han	65	Male	Squamous Carcinoma	Ⅱb	118						2015-11-20	2017-07-20	No	Yes	Death	17	No	Yes	No	No	No	No	Yes	7								7
P109	Han	68	Male	Squamous Carcinoma	Ⅱa	162	3.74		16.3	11	25.3	2016-12-15	2019-11-15	No	Yes	Death	17	No	Yes	No	No	No	No	No	29		29
P110	Han	75	Male	Adenocarcinoma	Ⅱb	230	3.43		18.7			2016-05-17	2019-11-15	No	No	Censored	41	Yes	No	No	No	No	No	No	30	30
P111	Han	71	Male		Ⅱb	198	7.49	1.58	15.6	13.4	40.5	2016-10-25	2017-04-16	No	Yes	Death	6	No	No	No	No	No	No	No	7								7
P112	Han	55	Male		Ⅱa	66	3.18		16.6			2016-08-31	2019-11-15	No	No	Censored	38	Yes	No	No	No	No	No	No
P113	Han	75	Male		Ⅲa	307	4.39	0.14	15	11.7	25.8	2016-09-28	2017-07-04	No	Yes	Death	30	Yes	Yes	Yes	No	No	No	No	120	32	42	26			18		2
P114	Han	75	Female		Ⅲa	256	3.5		19.4			2016-04-25	2019-11-15	No	Yes	Death	5	Yes	Yes	No	No	No	No	No	26			14	12
P115	Han	54	Male		Ⅲa	165	3.5		19			2016-04-19	2019-11-15	No	No	Censored	42	No	Yes	No	No	No	No	No	62	28			14		10		10
P116	Han	65	Male	Squamous Carcinoma	Ⅲa	343	4.59		24.26			2015-11-26	2017-03-13	No	Yes	Death	15	Yes	Yes	No	No	No	No	No	107	39	30				19		19
P117	Han	64	Male	Adenocarcinoma	Ⅲa	91	2.98		19			2015-07-15	2019-11-15	No	No	Censored	48	Yes	Yes	No	No	No	No	No	14			14
P118	Han	64	Female	Adenocarcinoma	Ⅲa	168	2.35	0.13	20.7	10.6	23.3	2016-01-11	2016-01-28	Yes		Censored	0	Yes	No	No	No	No	No	No	25			14				7		4
P119	Han	80	Female	Adenocarcinoma	Ⅲa	238	3.32		17.1			2015-12-01	2019-11-15	No	No	Censored	47	Yes	Yes	No	No	No	No	No	99		41	22			11	7	18
P120	Miao	69	Male	Squamous Carcinoma	Ⅲb	339	6.3		18.4			2015-04-03	2019-11-15	Yes		Censored	48	No	Yes	No	No	No	No	No	80	15	34				5	21	5
P121	Han	56	Female	Squamous Carcinoma	Ⅲa	226	4		15.2	11.3	27.3	2016-08-11	2018-02-23	No	Yes	Death	19	No	Yes	Yes	Yes	No	Yes	No	66	30			22		7		7
P122	Han	62	Male	Adenocarcinoma	Ⅲa	153	2.4	0.08	18.2	10.2	20.6	2016-11-10	2019-11-15	No	No	Censored	36	Yes	Yes	No	No	No	No	No	74		30	14			12		15	3
P123		64	Male	Squamous Carcinoma	Ⅲa	561	7.49		20.8	12.7	36.7	2016-02-23	2019-11-15	No	Yes	Death	44	Yes	Yes	No	No	No	No	No	48	6	14	14			7		7
P124	Han	60	Male	Adenocarcinoma	Ⅲa	141	2.6		18.7			2015-03-27	2019-01-15	No	No	Censored	45	Yes	Yes	Yes	No	No	No	No	131	100					13	13	5
P125	Han	70	Male	Adenocarcinoma	Ⅲb	316	3.39		17.6			2016-11-15	2016-01-07	No	Yes	Death	20	No	Yes	Yes	No	No	No	Yes	122	42			15		5	40	20
P126	Han	69	Male	Adenocarcinoma	Ⅲb	354	7.5		16.2			2015-03-07	2019-11-15	No	Yes	Death	29	Yes	Yes	Yes	No	No	No	No	847	321			28	300	19	84	95
P127	Han	49	Male	Squamous Carcinoma	Ⅲa	195	4.4	0.14	19.1	11.1	31.1	2015-06-12	2019-11-15	No	No	Censored	48	Yes	Yes	No	No	No	No	No	163		50	8	98			7
P128	Han	66	Male	Adenocarcinoma	Ⅲb	211	5		18.3			2015-05-12	2019-11-15	No	Yes	Death	10	No	Yes	No	No	No	No	No	123	36			12			50	25
P129	Han	56	Male		Ⅲa	149	6.17	0.24	15.2	12.2	31.3	2016-10-27	2019-11-15	No	No	Censored	36	Yes	Yes	No	No	No	No	No	54	50					4
P130	Han	80	Male	Squamous Carcinoma	Ⅲa	429	5.82	22.67	15.1	13.4	34.2	2016-04-07	2019-11-15	No	Yes	Death	18	No	No	No	No	No	No	Yes	398	114			74	90	60		60
P131	Han	76	Female	Adenocarcinoma	Ⅲa	256	3.74		16.3	10.6	24.2	2016-10-24	2017-09-21	No	Yes	Death	31	Yes	No	Yes	No	No	No	No	43	10	14	14			5
P132	Han	51	Female	Squamous Carcinoma	Ⅲa	249	3.84		19.9			2015-11-18	2016-09-12	No	Yes	Death	21	No	Yes	No	No	No	No	No	127	19	76	32
P133	Han	49	Female		Ⅲa	201	2.82	0.38	15.6	11.8	21.3	2016-08-30	2019-11-15	No	No	Censored	38	No	No	No	Yes	No	Yes	No	14		14
P134	Han	90	Male		Ⅱa	172	2.96		19.1			2015-12-07	2016-07-15	No	Yes	Death	6	No	No	No	No	No	No	Yes	187					180			7
P135	Han	46	Male	Poor Differentiated Carcinoma	Ⅲb	78			18.9			2015-01-25	2019-11-15	No	Yes	Death	17	No	Yes	Yes	No	No	No	No	419	113		14			106	80	106
P136	Zang	60	Female	Adenocarcinoma	Ⅲa	249	3.43	0.29	21.6	12.6	30	2016-01-27	2016-04-19	Yes		Censored	2	Yes	Yes	No	No	No	No	No	91	15	42				17		17
P137	Han	57	Male	Adenocarcinoma	Ⅲa	398	7.32		18.6			2016-06-16	2016-08-02	No	Yes	Death	5	No	Yes	Yes	No	No	No	No	25	14						11
P138	Han	73	Male	Squamous Carcinoma	Ⅱb	140	3.7		19.5	10.8	28.4	2015-05-14	2019-11-15	No	No	Censored	48	Yes	Yes	No	No	No	No	No	147	43	30	60			8	6
P139	Han	60	Male	Squamous Carcinoma	Ⅲa	248	4.61		17.1	11.1	26.2	2016-11-24	2017-05-09	Yes		Censored	5	Yes	Yes	No	No	No	No	No	112		90				11		11
P140	Han	74	Male	Squamous Carcinoma	Ⅱb	140	2.8	1.08	19.5	11	30.7	2015-06-16	2019-11-15	No	Yes	Death	18	Yes	Yes	No	No	No	No	No	39			30			3	6
P141	Han	50	Male	Squamous Carcinoma	Ⅱb	103	2.39	0.22	21.1	10.5	34.3	2016-04-08	2016-10-15	No	Yes	Death	19	No	No	No	No	No	No	No	5						5
P142	Hui	64	Male	Adenocarcinoma	Ⅲb	167	3.75		19.2			2015-12-16	2019-11-15	No	Yes	Death	37	No	Yes	No	No	No	No	No
P143	Han	69	Female		Ⅲa	256	2.61		16.5	11.3	23	2016-08-02	2016-11-28	No	Yes	Death	15	No	No	No	No	No	No	No
P144	Hui	73	Female	Adenocarcinoma	Ⅱb	239	2.5		19.7	9.8	24.7	2015-11-25	2019-11-15	No	No	Censored	45	Yes	Yes	Yes	No	No	No	No	1108	410	14	14	16	330	20	7	27	270
P145	Han	65	Male	Large Cell Carcinoma	Ⅱb	188	5.2		18.6	11.1	32.1	2015-06-25	2019-11-15	No	No	Censored	48	Yes	Yes	No	No	No	No	No	104	20		79			5
P146	Han	65	Male	Squamous Carcinoma	Ⅲa	201	6	0.24	18.4	11.1	30.3	2015-05-11	2019-11-15	No	No	Censored	48	Yes	Yes	No	No	No	No	No	28		14	14
P147	Han	65	Female	Poor Differentiated Carcinoma	Ⅲb	271	3.36	0.16	20	11	26.2	2016-06-29	2019-11-15	No	Yes	Death	5	Yes	Yes	No	No	No	No	No	10						5		5
P148	Han	55	Male		Ⅱa	283	4.3		18.2			2015-05-09	2019-11-15	No	Yes	Death	26	Yes	Yes	No	No	No	No	No	23	7		4			4		8
P149	Han	65	Male	Squamous Carcinoma	Ⅱb	84	1.72	0.27	21.8	11	30.6	2016-01-14	2019-11-15	No	No	Censored	46	Yes	Yes	No	No	No	No	No	145		30	76			15	24
P150	Han	53	Male	Squamous Carcinoma	Ⅲb	281	4.04		17.3			2016-07-07	2017-03-07	Yes		Censored	8	No	Yes	Yes	No	No	No	No	122				70		12	14	26
P151	Han	50	Male	Squamous Carcinoma	Ⅲb	195	4.67	0.52	14.7	12.4	25	2016-10-26	2017-02-10	No	Yes	Death	4	No	Yes	Yes	No	No	No	No	237	82			75		61		19
P152	Han	65	Male	Squamous Carcinoma	Ⅲb	192	6.95		17.9	11.4	27.2	2015-07-21	2019-11-15	No	No	Censored	48	Yes	No	Yes	No	No	No	No	171	40	74	44			13
P153	Han	59	Female	Adenocarcinoma	Ⅱb	243	6.5		16.3			2016-06-27	2019-11-15	No	Yes	Death	20	Yes	Yes	No	No	No	No	No	74		30	44
P154	Han	68	Male	Poor Differentiated Carcinoma	Ⅲa	284	2.51	0.19	16.8	10.1	22.6	2016-07-29	2019-11-15	No	No	Censored	39	Yes	Yes	No	Yes	No	Yes	Yes	12						7		5
P155	Han	78	Female	Adenocarcinoma	Ⅲa	90	3.09		15.9			2016-09-14	2019-11-15	No	No	Censored	38	Yes	Yes	No	No	No	No	No	110			12	56		19	14	9
P156	Han	68	Male	Squamous Carcinoma	Ⅲa	159	2.82		20.3	11.4	26.3	2016-03-11	2019-11-15	No	No	Censored	44	Yes	Yes	Yes	No	No	No	No	66	17		27			11		11
P157	Han	45	Female	Adenocarcinoma	Ⅱb	152	1.1	0.53	21.8	11.2	32.5	2015-05-14	2019-11-15	No	No	Censored	48	Yes	Yes	Yes	Yes	No	Yes	No	139	27	65				22		25
P158	Han	65	Male	Adenocarcinoma	Ⅱa	202	3.63		17.3			2016-05-19	2016-05-23	No	Yes	Death	14	No	No	No	No	No	No	No
P159	Han	63	Male	Squamous Carcinoma	Ⅲb	154						2015-06-16	2019-11-15	No	No	Censored	48	Yes	Yes	No	No	No	No	No	2						1	1
P160	Han	66	Female	Adenocarcinoma	Ⅲa	201	2.6		19	10.3	24.1	2016-04-12	2018-11-01	No	Yes	Death	41	Yes	Yes	No	No	No	No	No	7						7
P161	Han	56	Male	Adenocarcinoma	Ⅲa	129	2.7		19.6	10.5	31.5	2015-06-29	2019-11-15	No	No	Censored	48	Yes	No	Yes	No	No	No	No	35		14	14				7
P162	Han	62	Male	Squamous Carcinoma	Ⅲa	227	4.94	0.2	14.8	11.4	26.8	2016-10-24	2019-11-15	No	Yes	Death	7	No	Yes	Yes	No	No	No	No	158	10	15		14			53	66
P163	Han	57	Male	Squamous Carcinoma	Ⅲa	192	2.5	0.03	19.5	10	27.5	2015-11-25	2019-11-15	No	No	Censored	47	Yes	Yes	No	No	No	No	No	130		60				26	18	26
P164	Zang	73	Female	Adenocarcinoma	Ⅲa	143	2.36		25.2			2015-11-12	2019-11-15	No	Yes	Death	36	Yes	Yes	No	No	No	No	No	14		14
P165	Han	63	Male	Squamous Carcinoma	Ⅲa	207	6.76	0.32	16.6	12	28.6	2016-06-02	2019-11-15	No	Yes	Death	10	No	Yes	Yes	No	No	No	Yes	197				66		38	31	55	7
P166	Han	76	Female	Adenocarcinoma	Ⅲa	255	3.12		19.4			2016-07-04	2019-11-15	No	Yes	Death	12	Yes	Yes	No	No	No	No	No	598	598
P167	Han	73	Male	Adenocarcinoma	Ⅲa	224	4.21		19.4			2015-08-12	2019-11-15	No	No	Censored	48	Yes	No	Yes	No	No	No	No	2711	20	14					7		2670
P168	Han	65	Male		Ⅲb	427	6.57		18.4			2016-05-12	2016-05-13	No	Yes	Death	2	No	No	No	No	No	No	No
P169	Han	81	Male		Ⅲb							2016-08-22	2016-08-16	No	Yes	Death	1	No	No	No	No	No	No	No
P170	Han	61	Male	Poor Differentiated Carcinoma	Ⅲb	214	4.94	1.18	15.2	12.4	26.2	2016-10-01	2019-11-15	No	Yes	Death	2	No	No	No	No	No	No	No
P171	Han	46	Male	Poor Differentiated Carcinoma	Ⅲa	217	3.1		22.5	10.9	24.7	2016-01-18	2019-11-15	No	No	Censored	45	Yes	Yes	No	No	No	No	No	17		14				3
P172	Han	76	Male	Adenocarcinoma	Ⅲa	127	5.82	1.92	16.2	13.3	34	2016-04-26	2016-05-24	Yes		Censored	0	No	No	No	No	No	No	No	24				14			10
P173	Han	67	Male		Ⅲa	258	6.97		18.8			2016-05-03	2016-05-19	No	Yes	Death	16	Yes	No	No	No	No	No	No	14			14
P174	Han	73	Male	Squamous Carcinoma	Ⅱb	203	2.65		21			2015-08-24	2019-11-15	No	No	Censored	48	Yes	Yes	Yes	No	No	No	Yes	64	43		14				7
P175	Han	73	Female	Adenocarcinoma	Ⅲa	172	3.18	0.21	15.7	10.3	27.1	2016-07-20	2018-08-23	No	Yes	Death	26	Yes	No	No	No	No	No	No	35	14	14				7
P176	Han	65	Male	Squamous Carcinoma	Ⅲb	91	3.46		16	11.1	24.1	2016-11-11	2019-11-15	No	No	Censored	36	Yes	No	Yes	No	No	No	No	28		14				7	7
P177	Han	55	Male	Adenocarcinoma	Ⅲb	293	3.57		16.5			2016-06-21	2019-11-15	No	No	Censored	40	No	Yes	No	Yes	No	Yes	No	329	60			112		30		7	120
P178	Han	64	Male	Adenocarcinoma	Ⅲa	209	2.77		17.6	11.3	29.9	2016-10-19	2016-11-16	Yes		Censored	0	Yes	No	No	No	No	No	No	7						7
P179	Han	53	Male	Adenocarcinoma	Ⅲa	337	4.75	0.16	15.7	11	24.4	2016-11-01	2016-11-15	Yes		Censored	0	No	No	No	No	No	No	No
P180	Han	72	Male		Ⅱb	333	3.67	0.48	21.2	11	27.6	2016-04-13	2019-11-15	No	No	Censored	43	Yes	Yes	No	No	No	No	No	899	600	14		285
P181	Han	73	Male	Squamous Carcinoma	Ⅱa	292	3.64		18.4			2016-02-05	2019-11-15	No	No	Censored	45	No	Yes	No	No	No	No	Yes	1028	755			176		54	11	32
P182	Han	54	Male	Squamous Carcinoma	Ⅲa	196	5.5	0.95	16.1	10.9	27.7	2016-07-27	2019-11-15	No	Yes	Death	17	Yes	Yes	No	No	No	No	No	42	14	14				7	7
P183	Zang	55	Female	Adenocarcinoma	Ⅲb	220	3.1		31.1			2015-11-06	2016-02-03	Yes		Censored	2	Yes	Yes	No	No	No	No	No	84			44			8	3		29
P184	Han	61	Male	Squamous Carcinoma	Ⅲa	197	4.86		20.5			2016-04-13	2016-06-12	No	Yes	Death	2	No	Yes	No	No	No	No	No	38	3	30				5
P185	Han	56	Male	Squamous Carcinoma	Ⅱb	200	6.3		18.1	11.5	29.5	2015-03-10	2016-05-10	No	Yes	Death	29	Yes	No	No	No	No	No	No	49	14	14	14				7
P186	Han	61	Male	Squamous Carcinoma	Ⅲb	284	6.54	0.41	16.1	12.4	28	2016-07-08	2017-04-13	No	Yes	Death	14	No	Yes	Yes	No	No	No	No	54				14		19	5	16
P187	Han	74	Male	Squamous Carcinoma	Ⅲa	167	2.29	0.58	19.9	11.2	25.9	2016-04-30	2016-06-03	No	Yes	Death	16	No	No	No	No	No	No	Yes	34						9	5	20
P188	Han	52	Male	Squamous Carcinoma	Ⅱa	289						2015-12-24	2019-11-15	No	No	Censored	46	Yes	No	No	No	No	No	No	7								7
P189	Han	50	Female	Adenocarcinoma	Ⅱb	224	4.27	0.18	15.1	10.4	26.7	2016-12-05	2019-11-15	No	No	Censored	35	Yes	Yes	No	No	No	No	No	931	815		14	56		30	16
P190	Han	79	Male	Squamous Carcinoma	Ⅱb	205	4.1		16.2			2016-08-02	2017-10-12	No	Yes	Death	16	No	No	No	No	No	No	No	17						12	5
P191	Han	61	Male	Adenocarcinoma	Ⅲb	133	5		17.8	10.4	26.4	2015-12-31	2015-12-31	Yes		Censored	0	No	No	No	No	No	No	No	10						5		5
P192	Han	71	Female	Adenocarcinoma	Ⅲa	259	3.5		18.4			2015-03-28	2019-11-15	No	Yes	Death	17	Yes	No	No	No	No	No	Yes	6	6
P193	Han	67	Male	Squamous Carcinoma	Ⅲb	497	7.5		20.2			2015-03-28	2019-11-15	No	No	Censored	48	Yes	Yes	No	No	No	No	No	229	156	30	15			13		15
P194	Han	62	Male	Adenocarcinoma	Ⅱa	213						2016-04-01	2017-02-17	Yes		Censored	10	Yes	Yes	No	No	No	No	No	21		14				7
P195	Han	56	Male	Adenocarcinoma	Ⅱb	82						2016-06-27	2017-06-20	No	Yes	Death	15	Yes	Yes	Yes	No	No	No	No	172	32	14		70		28	10	18
P196	Han	38	Female	Squamous Carcinoma	Ⅲb	343	6.4		17.1			2015-02-27	2015-05-13	No	Yes	Death	5	No	Yes	No	No	No	No	No	76	14		24				24	14
P197	Han	80	Female	Adenocarcinoma	Ⅱb	258	2.92		19.5	12.2	29.5	2015-12-28	2019-11-15	No	No	Censored	46	Yes	No	Yes	Yes	No	Yes	No	734	30	674		30
P198	Han	56	Male	Squamous Carcinoma	Ⅲb	246	3.6		17.1			2015-01-21	2019-11-15	No	No	Censored	48	No	Yes	Yes	No	No	No	No	408	18	75		75	90	13	27		110
P199	Han	51	Female	Adenocarcinoma	Ⅱa	114	2.44		16.9	11.3	27.3	2016-09-01	2019-11-15	No	No	Censored	38	Yes	Yes	No	No	No	No	No	494	12	444	15			6		13	4
P200	Han	56	Male	Adenocarcinoma	Ⅲa	251						2016-06-29	2016-07-01	No	Yes	Death	2	No	No	No	No	No	No	No
P201		65	Male	Squamous Carcinoma	Ⅲb	257	4.7		18.3			2015-04-22	2015-06-09	No	Yes	Death	9	Yes	Yes	No	No	No	No	No	20		14						6
P202	Han	49	Male	Poor Differentiated Carcinoma	Ⅲa	91	3.04		21			2015-12-23	2019-11-15	No	No	Censored	48	Yes	Yes	Yes	No	No	No	No	328	90	59	15	90		35	2	37
P203	Han	80	Male	Adenocarcinoma	Ⅱb	101						2015-12-24	2020-01-06	No	Yes	Death	36	Yes	Yes	No	No	No	No	No	43	8	14	14				7
P204	Han	82	Male	Adenocarcinoma	Ⅱa	89	2.67	0.3	19.9	10.3	30.7	2016-04-05	2019-10-15	Yes		Censored	42	Yes	No	No	Yes	No	Yes	No	816	375			30	390	7	7	7
P205	Han	69	Female	Adenocarcinoma	Ⅱa	157	2.93	0.68	16.7	11.7	23.9	2016-09-29	2019-11-15	No	No	Censored	37	Yes	No	No	No	No	No	No	240	240
P206	Han	49	Female	Adenocarcinoma	Ⅲa	197	1.99		21.1			2016-05-12	2019-11-15	No	No	Censored	42	Yes	Yes	No	No	No	No	No	1770	1076	395		266		19		14
P207	Han	66	Male	Squamous Carcinoma	Ⅱa	254	3.5		16.4			2015-07-03	2019-11-15	No	Yes	Death	47	Yes	Yes	No	Yes	No	Yes	No	139	33	80				19		7
P208	Han	63	Male	Squamous Carcinoma	Ⅱa	231	4.72		21.5	11.7	27.7	2016-01-06	2018-04-28	Yes		Censored	27	Yes	Yes	No	No	No	No	Yes	92	19	20	16	30			7
P209	Han	56	Male		Ⅲb	224	3.25		15.2	10	24.5	2016-11-24	2017-07-17	Yes		Censored	7	Yes	Yes	No	No	No	No	Yes	93	3	20	28	14		8	11	9
P210	Han	55	Female	Adenocarcinoma	Ⅲb	209	4.35		21.5	11.2	29.2	2016-01-13	2016-08-08	No	Yes	Death	8	No	Yes	No	No	No	No	No	102	14	14	14	60
P211	Han	64	Male	Adenocarcinoma	Ⅲb	172	3.8		20.5	11.2	35.3	2015-07-21	2019-11-15	No	No	Censored	48	Yes	Yes	Yes	No	No	No	No	193	119	14				20	7	33
P212	Han	61	Male	Adenocarcinoma	Ⅲb	218	7		18.8			2015-07-14	2015-12-27	No	Yes	Death	5	No	No	No	No	No	No	No	6						6
P213	Han	61	Male	Squamous Carcinoma	Ⅲa	208	1.94		20.5			2016-05-07	2019-11-15	No	No	Censored	42	No	Yes	No	No	No	No	No	42		28				14
P214	Han	67	Male	Adenocarcinoma	Ⅲa	323	5.17		15.3	11.5	29.9	2016-11-04	2019-11-15	No	Yes	Death	12	No	Yes	Yes	No	No	No	No	131	44			28		3	34	22
P215	Han	66	Male	Adenocarcinoma	Ⅲa	306	5.5		18.5			2015-03-27	2019-11-15	No	No	Censored	48	Yes	Yes	Yes	No	No	No	No	50		14	14			22
P216	Han	81	Male	Adenocarcinoma	Ⅱb	208	3.62	1.34	17.6	11.3	33.2	2016-10-10	2019-11-15	No	Yes	Death	5	No	No	No	No	No	No	No
P217	Han	63	Male	Adenocarcinoma	Ⅲa	200	3.33		17.3	11.2	27.2	2016-01-19	2019-11-15	No	No	Censored	45	Yes	Yes	No	No	No	No	No	816		434	74	308
P218	Han	49	Male	Adenocarcinoma	Ⅱb	257						2016-07-21	2019-11-15	No	No	Censored	39	Yes	Yes	No	Yes	No	Yes	Yes	165	64		14	38		26		23
P219	Han	57	Female	Adenocarcinoma	Ⅲa	178	2.51		16.5			2016-06-30	2019-11-15	No	No	Censored	40	Yes	Yes	No	Yes	No	Yes	No	84	30	29				8		17
P220	Han	66	Female	Adenocarcinoma	Ⅱb	134	2.87		20.9	9.9	24.6	2016-01-27	2019-11-15	No	No	Censored	45	Yes	Yes	Yes	No	No	No	No	58	10	14		12			11	11
P221	Han	53	Male	Poor Differentiated Carcinoma	Ⅲa	222	4		17	12.2	28.8	2016-07-26	2017-08-10	No	Yes	Death	20	Yes	No	Yes	No	No	No	No	149	56	14	14			30		28	7
P222	Han	68	Male	Squamous Carcinoma	Ⅲb	316	5.17		15	13.9	42.8	2016-10-24	2016-12-05	No	Yes	Death	3	No	Yes	Yes	No	No	No	No	21				14			7
P223	Han	56	Male		Ⅲa	198	6.1		18.4	10.5	28.7	2015-07-23	2017-09-21	No	Yes	Death	13	Yes	Yes	Yes	No	No	No	No	191	69	64	29			15	3	11
P224	Zang	64	Male		Ⅱb	210	3.22		18.6			2016-06-21	2016-11-24	No	Yes	Death	17	Yes	Yes	No	No	No	No	No	113	30	44	15			12		12
P225	Han	55	Male	Squamous Carcinoma	Ⅱa	177	2.82		21.7	10.5	26.3	2016-01-18	2019-11-15	No	Yes	Death	15	Yes	Yes	No	No	No	No	No	43			14			23	6
P226	Han	63	Female	Adenocarcinoma	Ⅲa	96	2.1	0.29	19.6	10.5	31.4	2016-04-27	2019-11-15	No	No	Censored	42	Yes	Yes	No	No	No	No	No	30		14	16
P227	Han	67	Male		Ⅲb	91	3.12		16.1	11.8	29.3	2016-08-05	2019-11-15	No	No	Censored	39	No	No	No	No	No	No	No
P228	Han	71	Male		Ⅲa	134	3.48		16.6			2016-05-05	2019-11-15	No	No	Censored	42	Yes	No	No	No	No	No	No
P229	Han	55	Male	Poor Differentiated Carcinoma	Ⅱb	358	3.6		21.3	13.6	40	2015-06-13	2016-01-30	No	Yes	Death	10	Yes	No	No	No	No	No	No	36		14	14			1	7
P230	Han	73	Male	Squamous Carcinoma	Ⅲb	170	5.51	0.64	18.1	12.6	27.9	2016-06-17	2019-11-15	No	Yes	Death	2	No	No	No	Yes	No	Yes	No	39	18					7	7	7
P231	Han	50	Male	Adenocarcinoma	Ⅲa	248	2.9		19			2015-08-24	2019-11-15	No	No	Censored	48	Yes	Yes	No	Yes	No	Yes	No	195	51		82	15		29		18
P232	Han	45	Female		Ⅱb	174	4.35		18.8	10.3	30.9	2016-03-29	2019-11-15	No	No	Censored	43	No	No	No	No	No	No	No
P233	Han	60	Male	Squamous Carcinoma	Ⅱb	338	2.87		19.5	9.1	20.8	2015-11-27	2019-11-15	No	Yes	Death	28	Yes	Yes	No	No	No	No	No	112	14	43	16			13	14	12
P234	Han	76	Male	Adenocarcinoma	Ⅱb	206	2.9		18.9	10.7	25.2	2015-01-29	2019-11-15	No	Yes	Death	26	Yes	No	No	No	No	No	No	110	46		14	30		10		10
P235	Han	50	Male	Squamous Carcinoma	Ⅱb	138	3.8		17.8			2015-04-21	2019-11-15	No	Yes	Death	16	Yes	Yes	No	No	No	No	No	187	48	104	18			8	9
P236	Han	50	Male	Squamous Carcinoma	Ⅱb	178	3.73		15.5	11.4	28.2	2016-10-25	2019-11-15	No	No	Censored	36	Yes	Yes	No	No	No	No	No	132	66	15	30			10		11
P237	Han	63	Male	Squamous Carcinoma	Ⅲa	515	7.16	0.32	19.9	12.8	29.9	2016-03-30	2016-05-26	Yes		Censored	1	Yes	Yes	No	No	No	No	No	67		1	26	30		10
P238	Han	66	Male	Squamous Carcinoma	Ⅲb	332	3.75	0.21	19.4	11.7	28.7	2016-05-11	2019-10-14	No	Yes	Death	41	No	Yes	Yes	No	No	No	No	37	10						13	14
P239	Han	56	Female	Adenocarcinoma	Ⅱb	240	2.64		20.1	11.1	26.6	2016-01-05	2019-11-15	No	No	Censored	46	Yes	Yes	No	No	No	No	No	84	28	28	28
P240	Han	67	Male	Adenocarcinoma	Ⅱb	187	5		18.5			2016-07-03	2019-11-15	No	No	Censored	40	Yes	Yes	Yes	No	No	No	Yes	1153	1048			42		32	2	29
P241	Han	67	Male	Squamous Carcinoma	Ⅲa	212	4.59		19.1	10.8	27.7	2015-12-07	2019-11-15	No	No	Censored	47	Yes	Yes	No	No	No	No	No	49	14	14	14				7
P242	Zang	56	Female		Ⅲa	204	3.06		16.5	11	28	2016-09-02	2019-11-15	No	No	Censored	38	Yes	No	Yes	No	No	No	No	21		14					7
P243	Han	65	Female	Adenocarcinoma	Ⅲa	119	2.93	0.4	17.3	11.8	24.4	2016-10-31	2017-07-20	No	Yes	Death	22	Yes	Yes	No	No	No	No	No	125		44	14	60		7
P244	Han	78	Male	Adenocarcinoma	Ⅲa	153						2015-06-08	2016-06-12	No	Yes	Death	7	Yes	No	No	No	No	No	No	7							7
P245	Han	49	Male	Squamous Carcinoma	Ⅲa	262	2.92	0.07	17.1	11.1	28.3	2016-08-02	2019-11-15	No	No	Censored	39	Yes	Yes	Yes	No	No	No	No	868	837	14				5		12
P246	Han	56	Male	Adenocarcinoma	Ⅲa	321	4.34		14.9	10.4	27.4	2016-11-17	2016-12-06	Yes		Censored	0	Yes	No	No	No	No	No	No	7						7
P247	Han	62	Male	Squamous Carcinoma	Ⅱa	224	3.4	0.08	16.2	10.4	27.9	2016-12-15	2019-11-15	No	No	Censored	35	Yes	Yes	No	No	No	No	No	20			12			8
P248	Han	53	Male	Adenocarcinoma	Ⅲa	195	1.9	0.19	20	11.7	35.9	2015-06-19	2016-06-10	No	Yes	Death	31	Yes	Yes	No	No	No	No	No	129	67	29	17			13		3
P249	Han	61	Male	Squamous Carcinoma	Ⅱa	146	1.93		18.6	10.6	24.3	2016-03-22	2019-11-15	No	Yes	Death	4	Yes	No	No	No	No	No	No
P250	Han	55	Male	Squamous Carcinoma	Ⅱa	198	2.81		16.4	10.6	23.9	2016-09-07	2019-11-15	No	No	Censored	38	Yes	No	No	No	No	No	No	30	8		16			6
P251	Han	59	Female	Adenocarcinoma	Ⅱb	183	2.33	0.43	15.9	12.1	24.7	2016-09-26	2019-11-15	No	Yes	Death	15	No	No	No	Yes	No	Yes	No
P252	Han	45	Male	Squamous Carcinoma	Ⅲa							2015-01-05	2015-07-01	No	Yes	Death	27	Yes	Yes	No	No	No	No	No	286	110	120	20			18	18
P253	Han	69	Female	Adenocarcinoma	Ⅲb							2015-08-10	2017-11-01	No	Yes	Death	26	No	No	No	Yes	No	Yes	No
P254	Han	69	Male	Poor Differentiated Carcinoma	Ⅲb	108	5.12		16.4	13.3	31.2	2015-08-12	2019-11-15	No	Yes	Death	8	Yes	Yes	No	No	No	No	No	75	34	28				3	10
P255	Han	82	Female	Adenocarcinoma	Ⅲa	221	3.25		16.6			2016-07-14	2017-11-06	Yes		Censored	15	Yes	No	No	No	No	No	No
P256	Han	62	Male	Squamous Carcinoma	Ⅲa	146						2016-05-28	2016-06-10	No	Yes	Death	0	Yes	No	No	No	No	No	No	38						12	22	4
P257	Han	70	Male	Squamous Carcinoma	Ⅱb	179	3.25		16.3			2016-08-05	2018/2/3	Yes		Censored	17	Yes	No	No	No	No	No	No
P258	Han	67	Male	Squamous Carcinoma	Ⅱb	187	4.94		17.4			2016-06-23	2018-10-24	No	Yes	Death	32	Yes	Yes	Yes	No	No	No	No	72	34	14	14			2	4	4
P259	Han	79	Male	Adenocarcinoma	Ⅲa	150	2.55	2.99	15.7	13.3	26.4	2016-10-17	2017-08-17	No	Yes	Death	10	No	Yes	Yes	No	No	No	No	259	64			120	30		20	25
P260	Han	79	Male	Adenocarcinoma	Ⅱa	133	2.74		16.9	11	26.4	2016-12-23	2019-11-15	No	No	Censored	34	Yes	No	No	No	No	No	No
P261	Han	84	Female	Squamous Carcinoma	Ⅲb	307						2016-03-04	2019-11-15	No	Yes	Death	6	Yes	No	No	No	No	No	No	22		14				4	4
P262	Han	73	Male	Squamous Carcinoma	Ⅲa	206	4.94		17.3			2016-05-17	2017-02-12	No	Yes	Death	8	No	Yes	No	No	No	No	No	10									10
P263	Han	63	Male	Squamous Carcinoma	Ⅲa	107	2.39		16.4	11.6	27.1	2016-08-01	2017-11-02	No	Yes	Death	23	Yes	Yes	Yes	No	No	No	No	87	60	14						13
P264	Han	70	Male	Squamous Carcinoma	Ⅲa	226	7.14		14	12	32.6	2016-12-20	2019-11-15	No	Yes	Death	11	No	Yes	Yes	No	No	No	No
P265	Han	73	Male	Squamous Carcinoma	Ⅱb	445	5.4		19.5	11.4	25.8	2015-03-17	2015-04-15	Yes		Censored	0	Yes	No	No	No	No	No	No	35		14	14				7
P266	Han	80	Male	Squamous Carcinoma	Ⅲb	416						2015-07-31	2017-03-28	No	Yes	Death	1	No	Yes	No	No	No	No	No	160	74						79	7
P267	Han	59	Female	Adenocarcinoma	Ⅱa	229	3.3		19.2			2015-07-02	2019-11-15	No	No	Censored	48	Yes	Yes	Yes	Yes	No	Yes	Yes	1418	1265	14				73	7	59
P268	Han	55	Male	Adenocarcinoma	Ⅱa	211	1.96	0.15	17	9.6	21.4	2016-09-29	2019-11-15	No	No	Censored	37	Yes	No	No	No	No	No	No	9						9
P269	Han	62	Male	Adenocarcinoma	Ⅱa		3.05	1.49	18.2	11.7	24.7	2016-06-27	2018-01-11	Yes		Censored	18	Yes	Yes	Yes	No	No	No	No	115	57	14	14			16	5	9
P270	Han	50	Male	Squamous Carcinoma	Ⅲa	172	4.23		19.9			2015-12-17	2019-11-15	Yes		Censored	46	Yes	Yes	Yes	No	No	No	No	106		27	15	39			20	5
P271	Han	72	Female	Adenocarcinoma	Ⅲb	232	2.6	0.72	20.2	10.2	28.5	2015-02-10	2019-11-15	No	Yes	Death	27	Yes	No	No	No	No	No	No	14	14
P272	Han	66	Male		Ⅱb	184	2.28		18.1	10	21	2016-10-31	2016-11-15	No	Yes	Death	22	Yes	No	No	No	No	No	No	49	10	10	22				7
P273	Han	54	Female	Adenocarcinoma	Ⅲa	233	3.12		14.6	10.5	21.3	2016-12-29	2018-01-27	No	Yes	Death	25	No	Yes	No	No	No	No	No	267	112			28		57	18	52
P274	Han	78	Male	Adenocarcinoma	Ⅲa	108	3.25		16.5	11	28.8	2016-11-10	2019-11-15	No	Yes	Death	41	No	Yes	Yes	No	No	No	No	568	415			84		13	37	10	9
P275	Han	68	Male	Squamous Carcinoma	Ⅲb	170	5.48		18.2			2015-11-20	2019-11-15	No	Yes	Death	35	Yes	Yes	Yes	No	No	No	No	1570	1140			420		3	7
P276	Han	67	Male	Squamous Carcinoma	Ⅲa	92	4.79	0.69	15.7	11	26.1	2016-10-26	2017-04-06	No	Yes	Death	11	No	Yes	No	No	No	No	No	102		52	28			13	2	7
P277	Han	50	Female	Adenocarcinoma	Ⅱb	200	3.06		16.9	10.9	29.8	2016-11-09	2019-11-15	No	No	Censored	36	Yes	No	No	No	No	No	No	14						7	7
P278	Han	72	Male	Adenocarcinoma	Ⅱa	117	2.54		22	11.8	30.4	2016-01-29	2019-11-15	No	Yes	Death	40	Yes	No	No	Yes	No	Yes	No	21			14					7
P279	Han	54	Male	Squamous Carcinoma	Ⅲa	180	2.59		17.3	11.8	29	2016-01-10	2019-11-15	No	Yes	Death	36	No	Yes	No	No	No	No	No	259	97	29		90		24		19
P280	Han	68	Male	Squamous Carcinoma	Ⅱb	165	3.4		18.5	9.3	25.7	2015-01-12	2019-11-15	No	Yes	Death	43	Yes	Yes	No	No	No	No	No	43		30				4	4	5
P281	Han	77	Male	Squamous Carcinoma	Ⅲb	82	4.1		18.7	10.9	26.8	2015-07-21	2017-04-06	No	Yes	Death	31	Yes	No	Yes	No	No	No	No	646	320		14	300		5	7
P282	Han	80	Male	Squamous Carcinoma	Ⅱb	217	4.77		16.9			2015-07-21	2016-07-28	No	Yes	Death	12	No	No	Yes	No	No	No	No	24						12		12
P283	Han	53	Male	Squamous Carcinoma	Ⅱb	312	3.86		20.2	13.9	32.7	2015-12-28	2019-11-15	No	No	Censored	46	Yes	Yes	No	No	No	No	No	42	14	14	14
P284	Han	60	Female	Adenocarcinoma	Ⅱa	135	3.84		18.7	10.9	31.1	2016-02-18	2019-11-15	No	Yes	Death	13	No	Yes	No	No	No	No	No	14		14
P285	Han	78	Male	Adenocarcinoma	Ⅱb	193	3.5		19.6	11.3	24.8	2015-05-29	2019-11-15	No	Yes	Death	24	Yes	Yes	No	No	No	No	No	658	34	14	14	44		35	7	25	485
P286	Han	53	Female	Adenocarcinoma	Ⅲa	194	3.7	0.47	18.2	10.8	20.6	2015-05-15	2019-11-15	No	No	Censored	48	Yes	Yes	No	No	No	No	No	87	27	30	14			7		9
P287	Han	74	Female		Ⅲa	143	3.32		18.8			2015-08-17	2019-11-15	No	No	Censored	48	Yes	No	No	Yes	No	Yes	No	687	520			144			16	7
P288	Han	66	Male	Squamous Carcinoma	Ⅲb	114	4.17		16.2	10.8	25.6	2016-07-29	2019-11-15	No	No	Censored	39	No	Yes	Yes	No	No	No	Yes	984	787			108		43	3	40	3
P289	Zang	70	Male	Adenocarcinoma	Ⅲa	118	2.56	0.03	17.6	10.8	24.8	2016-04-27	2016-07-08	Yes		Censored	2	Yes	Yes	No	No	No	No	No	70		29	15			13		13
P290	Han	59	Female	Adenocarcinoma	Ⅲa	210	2.9		19.9	9.3	24.8	2015-01-31	2016-01-21	Yes		Censored	11	Yes	No	No	No	No	No	No	264	30	234
P291	Han	56	Male	Squamous Carcinoma	Ⅱb	156	2.46		19.5			2016-04-14	2019-11-15	No	No	Censored	43	Yes	Yes	No	No	No	No	No	104	28	14	29			15		18
P292	Han	65	Male		Ⅲb							2016-09-14	2016-09-20	No	Yes	Death	27	No	No	No	No	No	No	No	7								7
P293	Han	71	Male	Adenocarcinoma	Ⅱa	195	3.4		19.4			2015-04-30	2019-11-15	No	No	Censored	48	Yes	Yes	No	No	No	No	No	123			90			31	2
P294	Han	50	Male	Squamous Carcinoma	Ⅱb	152	2.42		19.5			2016-05-11	2019-11-15	No	No	Censored	42	Yes	Yes	No	No	No	No	No	14			14
P295	Han	37	Male		Ⅲa	134						2016-08-12	2016-08-16	No	Yes	Death	11	No	Yes	No	No	No	No	No	28	14					7		7
P296	Han	73	Male		Ⅲb	283	4.86	2.31	20.5	12	30.2	2015-11-13	2016-01-08	No	Yes	Death	12	No	Yes	No	No	No	No	No	28		14	14
P297	Han	46	Female	Adenocarcinoma	Ⅲb	186	3.3		18.9	11	23.7	2015-04-14	2019-11-15	No	No	Censored	48	Yes	No	No	Yes	No	Yes	No	14		14
P298	Han	66	Male	Squamous Carcinoma	Ⅲa	294	6.7		17.3	11.4	29.3	2015-07-08	2016-11-22	No	Yes	Death	14	Yes	Yes	No	No	No	No	No	107	35		44			13	15
P299	Han	56	Female	Adenocarcinoma	Ⅱb	243	2.93		17	11.7	25.6	2016-08-24	2019-11-15	No	No	Censored	38	Yes	Yes	No	No	No	No	No	34		14				9		11
P300	Han	76	Male	Squamous Carcinoma	Ⅱb	60	3.2	0.19	17.9	11.6	29.6	2016-08-16	2017-04-17	No	Yes	Death	10	Yes	No	No	No	No	No	Yes	469	224	14		210		7	7	7
P301	Han	70	Male		Ⅲa	129	3.18		16.2	11.3	27	2016-08-11	2017-01-19	No	Yes	Death	14	No	Yes	Yes	No	No	No	No	35						2	6	13	14
P302	Han	64	Male	Squamous Carcinoma	Ⅲb	322	7		17.8			2015-07-31	2016-03-13	No	Yes	Death	7	No	No	No	No	No	No	No	60	4				30				26
P303	Han	53	Male	Adenocarcinoma	Ⅱb	298	3.43		20.7	10.1	27.1	2016-02-02	2016-10-18	Yes		Censored	8	Yes	Yes	No	No	No	No	Yes	247		14		84		65	31	53
P304	Han	69	Male	Squamous Carcinoma	Ⅱb	247	5.1		17.1			2015-04-18	2019-11-15	No	No	Censored	48	No	No	No	No	No	No	No	10							10
P305	Han	69	Male	Squamous Carcinoma	Ⅱb	158						2016-04-29	2019-11-15	No	No	Censored	42	Yes	Yes	No	No	No	No	No	42	14	14	14
P306	Han	56	Male	Adenocarcinoma	Ⅲa	172	2.58		19	10.3	23.8	2016-04-05	2019-11-15	No	Yes	Death	12	Yes	Yes	No	No	No	No	No	75	4	45				13		13
P307	Han	69	Male	Squamous Carcinoma	Ⅲa	267	3.96	0.31	16.7	13.8	37.3	2016-10-28	2019-11-15	No	Yes	Death	1	No	No	No	No	No	No	No	21						21
P308	Han	52	Male	Adenocarcinoma	Ⅲb	199	3.75		19.7			2015-12-30	2019-11-15	No	Yes	Death	2	No	Yes	No	No	No	No	No	62	28				14	11		9
P309	Han	67	Female	Adenocarcinoma	Ⅲa	171	3.1		19.8			2015-12-14	2019-11-15	No	No	Censored	47	Yes	Yes	Yes	Yes	No	Yes	Yes	1058	598	14	14	51	300		24	27	30
P310	Han	50	Male	Squamous Carcinoma	Ⅱb	115	4.94		15.4	12.1	45.7	2016-09-23	2017-09-08	No	Yes	Death	15	Yes	Yes	Yes	No	No	No	No	137		14		27		29	19	48
P311	Zang	61	Male	Adenocarcinoma	Ⅱb	105	3.25		14.5	11	26.4	2016-09-06	2019-11-15	No	Yes	Death	20	Yes	Yes	No	No	No	No	No	60		40	15			5
P312	Han	75	Male	Squamous Carcinoma	Ⅱb	195	3.16		19.6			2015-09-29	2016-09-27	No	Yes	Death	12	Yes	Yes	Yes	No	No	No	No	186	40	66	44			12	12	12
P313	Han	63	Male	Adenocarcinoma	Ⅲb	214	2.79		15.8	11	24.8	2016-09-22	2017-10-12	No	Yes	Death	15	No	Yes	Yes	No	No	No	No	642	344			269		25	4
